# Supplementary material for: Selenium-Stimulated Exosomes Enhance Wound Healing by Modulating Inflammation and Angiogenesis
Source: MDPI journal article supplement (doi:10.3390/ijms231911543), 2022-09-29

**Supplementary information**

# **Selenium-Stimulated Exosomes Enhance Wound Healing by Modulating Inflammation and Angiogenesis**

**June Seok Heo**

Cell Therapy Center, Severance Hospital, Seoul 03722, Korea

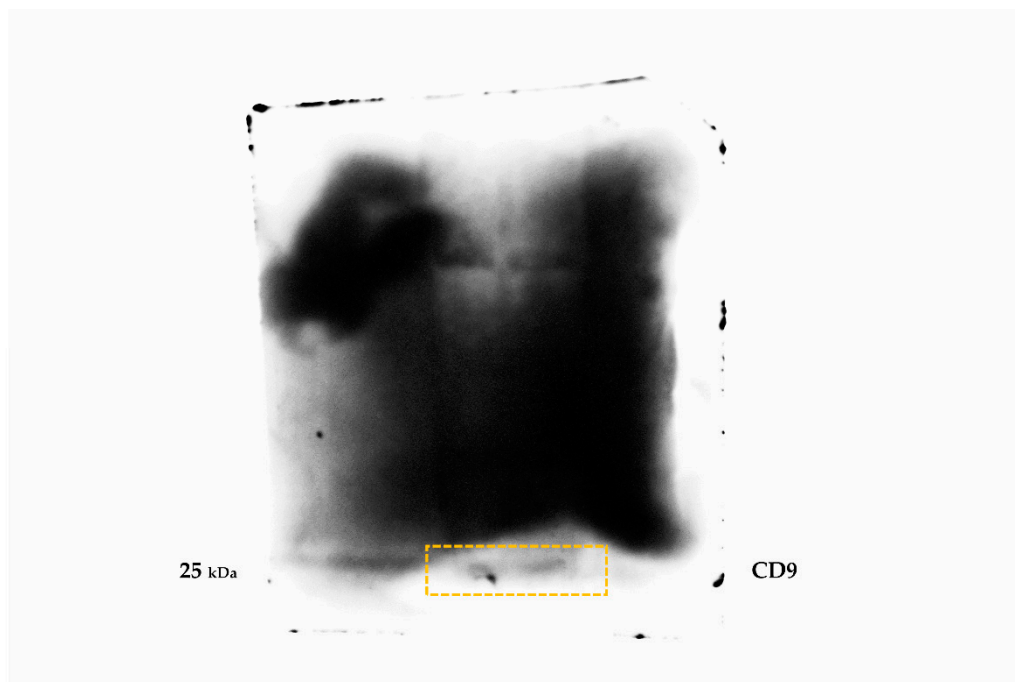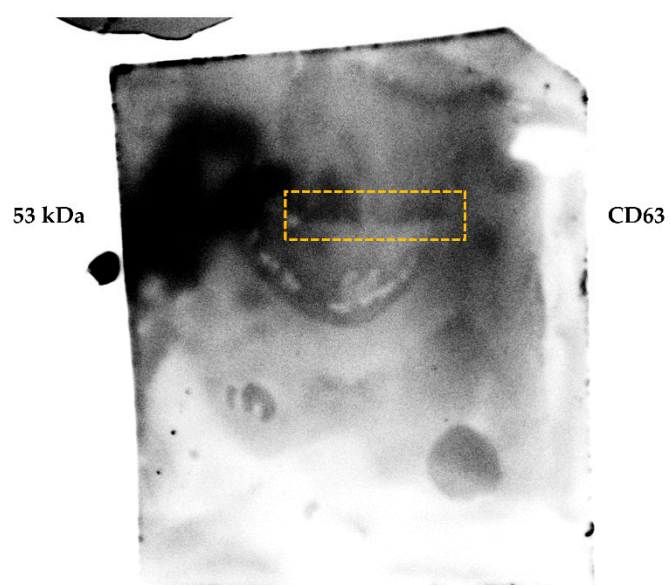

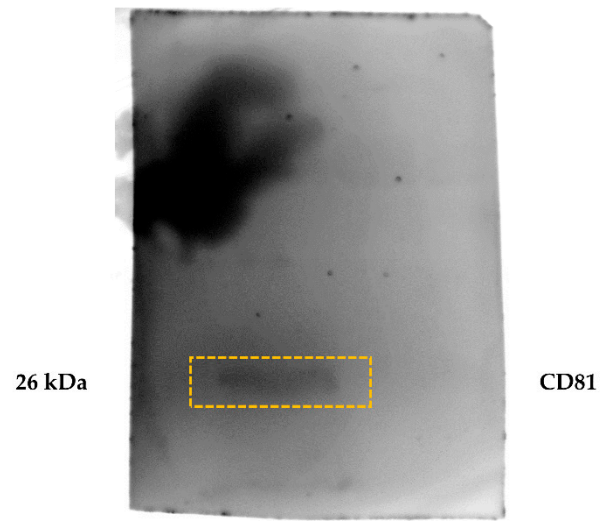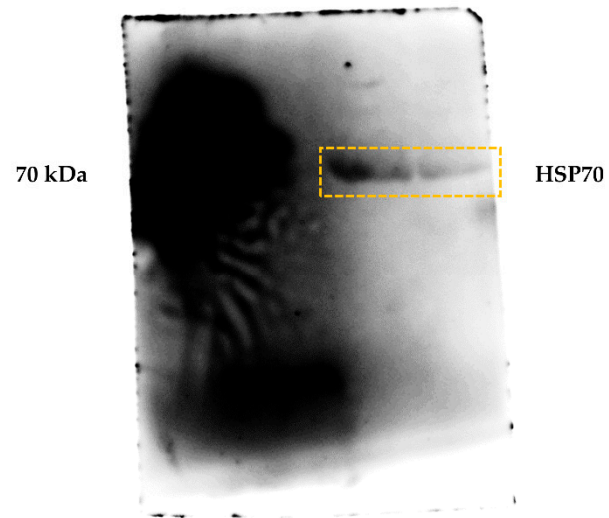

**Figure S1.** CD9, CD63, CD81 and HSP70 of exosomal markers were detected in AdMSCs-derived exosomes by Western blot assay.

**Table S1.** Primers sequences used for real-time PCR.

| Primer Name                 | Sequence                                                  |
|-----------------------------|-----------------------------------------------------------|
| GAPDH                       | F: ACCCACTCCTCCACCTTTGA<br>R: CTGTTGCTGTAGCCAAATTCGT      |
| IL-6                        | F: AGACAGCCACTCACCTCTTCAG<br>R: TTCTGCCAGTGCCTCTTTGCTG    |
| IL-8                        | F: AAGAGAGCTCTGTCTGGACC<br>R: GATATTCTCTTGGCCCTTGG        |
| TSG-6                       | F: GGTGTGTACCACAGAGAAGCA<br>R: GGGTTGTAGCAATAGGCATCC      |
| TGF- $\beta$ 1              | F: TACCTGAACCCGTGTTGCTCTC<br>R: GTTGCTGAGGTATCGCCAGGAA    |
| Runx2                       | F: TTGCAGCCATAAGAGGGTAG<br>R: GTCACTTTCTTGGAGCAGGA        |
| TNF $\alpha$                | F: TTGAGGGTTTGCTACAACATGGG<br>R: GCTGCACTTTGGAGTGATCG     |
| Arginase-1                  | F: ACAGTTTGGCAATTGGAAGCA<br>R: CACCCAGATGACTCCAAGATCAG    |
| CD206<br>(Mannose receptor) | F: TTCGGACACCCATCGGAATTT<br>R: CACAAGCGCTGCGTGGAT         |
| Type I collagen             | F: GTCACCCACCGACCAAGAAACC<br>R: AAGTCCAGGCTGTCCAGGGATG    |
| Type III collagen           | F: GGAGCTGGCTACTTCTCGC<br>R: GGGAACATCCTCCTTCAACAG        |
| BMP7                        | F: CCAACGTCATCCTGAAGAAATAC<br>R: GCTTGTAGGATCTTGTTCAATTGG |
| C/EBPA                      | F: CCAAGAAGTCGGTGGACAAGAA<br>R: TCATTGTCACTGGTCAGCTCCA    |
| IL-10                       | F: TCTCCGAGATGCCTTCAGCAGA<br>R: TCAGACAAGGCTTGGCAACCCA    |
| p16                         | F: CGAATAGTTACGGTCGGAGG<br>R: GCATGGTTACTGCCTCTGGT        |

|                           |                                                          |
|---------------------------|----------------------------------------------------------|
| p21                       | F: GCGATGGAACCTTCGACTTTG<br>R: CGTTTTTCGACCCTGAGAGAGTC   |
| CD163                     | F: CGGCTGCCTCCACCTCTAAGT<br>R: ATGAAGATGCTGGCGTGACA      |
| Angiopoietin1<br>(ANGPT1) | F: CTTCAAGGCTTGGTTACTCGTC<br>R: CTCTTCCTCTCTTTTCCTCCC    |
| KDR<br>(Flk-1)            | F: AACGACTGCCTTATGATGCC<br>R: ACTGTCCTGCAAGTTGCTGTC      |
| Vasohibin1<br>(VASH1)     | F: CTCAAGATTGGCAAAGGGACG<br>R: TTCACTGCGGCTGTTCTCTGC     |
| VEGF                      | F: AGCCTTGTTTCAGAGCGGAGAA<br>R: TAACTCAAGCTGCCTCGCCTT    |
| $\alpha$ SMA              | F: ACTGAGCGTGGCTATTCCTCCGTT<br>R: GCAGTGGCCATCTCATTTC    |
| Elastin                   | F: GGCCATTCCTGGTGGAGTTCC<br>R: AACTGGCTTAAGAGGTTTGCCTCCA |

---

**Table S2.** Upregulation of miRNAs in exosomes secreted by AMSCs.

|                         | Gained miRNAs | Sel-Exos/Exos |
|-------------------------|---------------|---------------|
| Anti-Inflammatory       | miR-146a-5p   | 94.612        |
|                         | miR-340-5p    | 38.002        |
|                         | miR-223-3p    | 34.601        |
|                         | miR-125b-5p   | 19.029        |
|                         | miR-16-5p     | 12.443        |
|                         | miR-149-3p    | 12.443        |
|                         | miR-105-5p    | 11.715        |
|                         | miR-181c-3p   | 11.715        |
|                         | miR-146b-5p   | 4.767         |
|                         | miR-181a-5p   | 3.795         |
| Pro-Angiogenic          | miR-378a-3p   | 2.546         |
| Proliferation/Migration | miR-205-5p    | 118.861       |
|                         | miR-146a-5p   | 94.612        |
|                         | miR-184       | 3.814         |
| Remodeling              | miR-129-5p    | 1202.524      |
|                         | miR-29b-3p    | 594.584       |

**Table S3.** Downregulation of miRNAs in exosomes secreted by AMSCs.

| Lost miRNAs                  |            | Sel-Exos/Exos |
|------------------------------|------------|---------------|
| Pro-Inflammatory             | miR-140-5p | 0.002         |
|                              | miR-33a-5p | 0.072         |
|                              | miR-155-5p | 0.403         |
| Anti-Angiogenic              | miR-20a-5p | 0.001         |
|                              | miR-192-5p | 0.107         |
|                              | miR-24-3p  | 0.292         |
|                              | miR-320b   | 0.305         |
| Anti-Proliferation/Migration | miR-99b-3p | 0.00007       |
|                              | miR-185-5p | 0.031         |
|                              | miR-141-3p | 0.351         |

**Figure S2.** Gene ontology enrichment of the top 10 upregulated miRNAs.

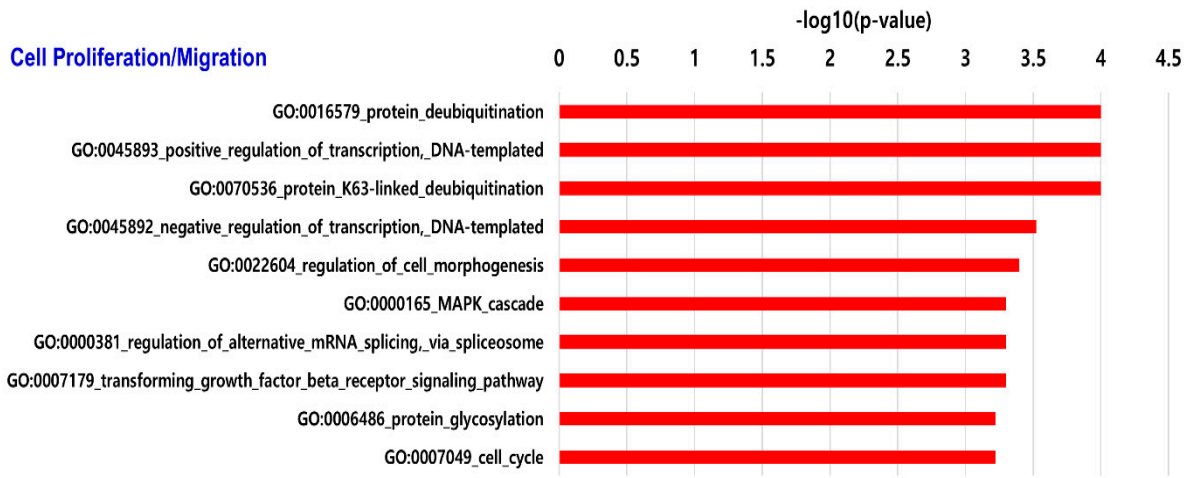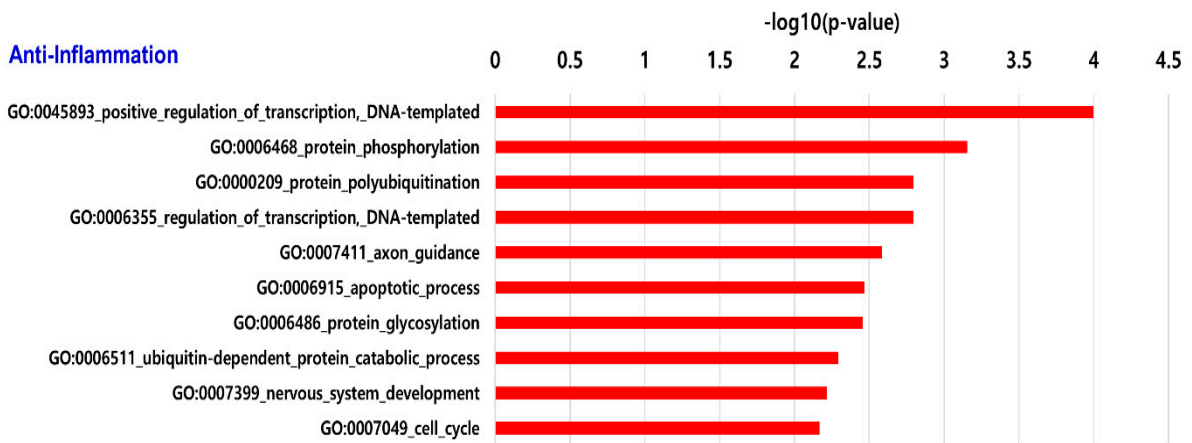



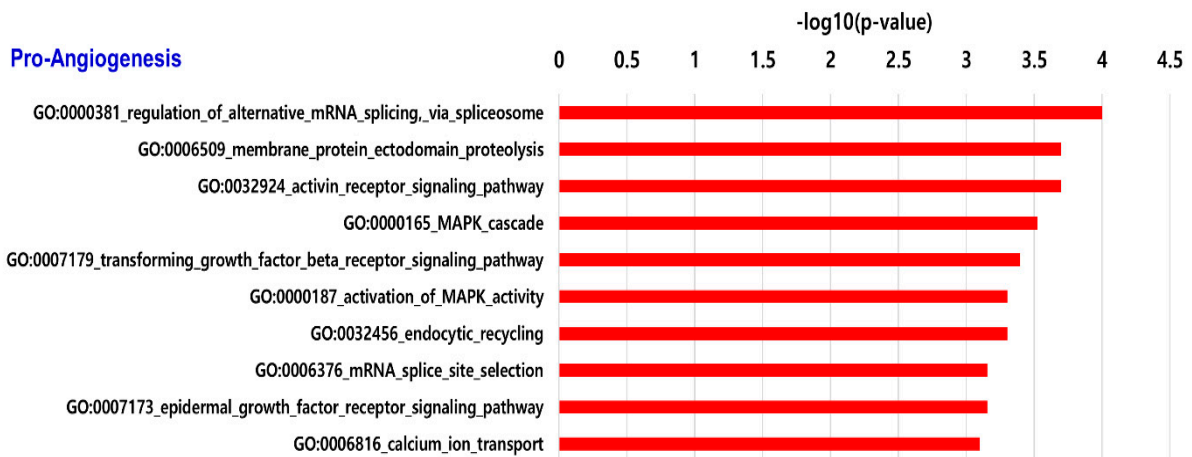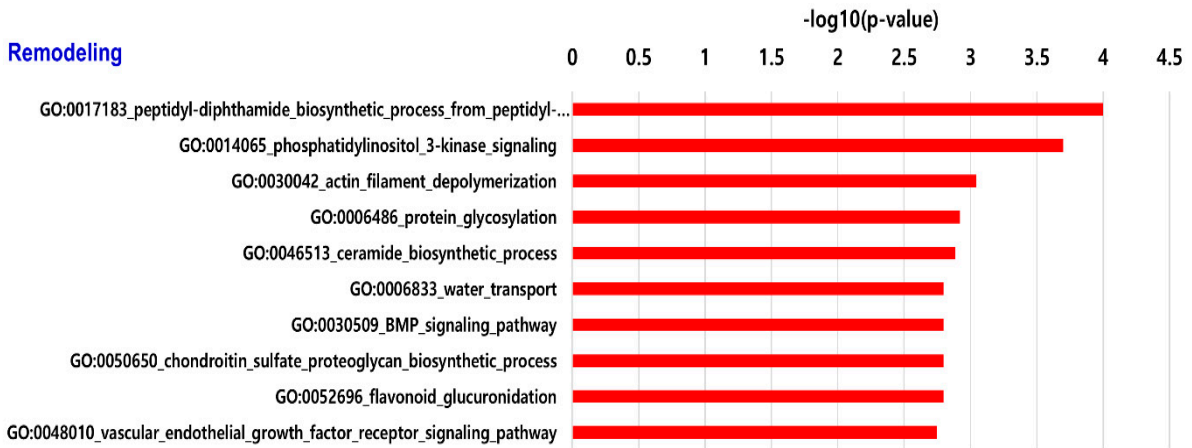

Supplement: s1 [file s1]
